# Supplementary material
Source: PubMed Central journal article supplement (PMC3411998)
Supplement: 1209979109_pnas.201209979SI.pdf [file 1209979109_pnas.201209979SI.pdf]

# Supporting Information

Kajiwarara et al. 10.1073/pnas.1209979109

## SI Materials and Methods

**Hepatic Differentiation in Vitro.** For the hepatic differentiation of human induced pluripotent stem/embryonic stem cells (hiPS/ESCs), we initially applied a previously reported hepatic differentiation protocol designed for hESCs (1) with some modifications. Briefly, small clumps of undifferentiated hiPS/ESCs were seeded on Matrigel (growth-factor reduced; BD Biosciences)-coated plates and cultured in mouse embryonic fibroblast (MEF)-conditioned Primate ES cell medium supplemented with 4 ng/mL bFGF. When the hiPS/ESCs reached nearly 70% confluence, the medium was replaced with RPMI1640 (Nacalai Tesque) containing 1× B27 supplement (Invitrogen), 100 ng/mL activin A (PeproTech), 50 ng/mL Wnt3a (R&D Systems), and 1 mM sodium butyrate (NaB) (Sigma) for 1 d. On the following 2 d, sodium butyrate was omitted from the medium. After 3 d of culture in serum-free activin A-based medium, the culture medium was replaced with knockout-DMEM (KO-DMEM) containing 20% (vol/vol) knockout serum replacement (KSR), 1 mM L-glutamine, 1% (vol/vol) nonessential amino acids, 0.1 mM 2-mercaptoethanol (all from Invitrogen), and 1% (vol/vol) DMSO (Sigma) (differentiation medium) for 7 d. Finally, the cells were cultured in hepatocyte culture medium (Lonza) supplemented with 20 ng/mL hepatocyte growth factor (HGF) (PeproTech) and 20 ng/mL oncostatin M (OSM) (PeproTech) (maturation medium) for another 7 d. The medium was changed daily during the differentiation period.

For endodermal cell induction from single hiPS/ESCs, the hiPS/ESCs were incubated with Accutase (Innovative Cell Technologies) for 20 min and dissociated into single cells by pipetting. Cells were resuspended with RPMI1640 medium containing 1× B27 supplement, 100 ng/mL activin A, 50 ng/mL Wnt3a, and 10 μM Y27632 (Wako) and were seeded on Matrigel-coated culture dishes at a density of  $1 \times 10^5$  cells/cm<sup>2</sup>. Beginning the next day, Y27632 was omitted from the medium, and 0.5 mM NaB was added in the culture medium as described in the main text. For hepatic differentiation, further cultivation was performed with the differentiation medium and maturation medium described above from day 7 to day 13 and from day 14 to day 20, respectively.

**Immunohistochemical Staining.** The cells were fixed with PBS containing 4% (wt/vol) paraformaldehyde (PFA) for 10 min at room temperature. After washing the cells with PBS, non-specific binding was blocked with PBS containing 5% (vol/vol) normal goat or donkey serum (Chemicon), 1% BSA (wt/vol) (Nacalai Tesque), and 0.1% (vol/vol) Triton X-100 for 45 min at room temperature. The primary antibodies used included HNF4A (1:500; Santa Cruz sc-6556), AFP (1:200; DAKO A0008), ALBUMIN (1:200; Bethyl A80-229A), A1AT (1:50; Invitrogen 180002), SOX17 (1:300; R&D Systems AF1924), and OCT3/4 (1:100; Santa Cruz sc-5279). The secondary antibodies used were cyanine3 (Cy3)-conjugated anti-goat IgG (1:500; Chemicon) for HNF4A, Alexa488-conjugated anti-rabbit IgG (1:500; Invitrogen) for AFP, Alexa488-conjugated anti-goat IgG

(1:500; Invitrogen) for ALBUMIN and SOX17, Cy3-conjugated anti-rabbit IgG (1:500; Chemicon) for A1AT, and Cy3-conjugated anti-mouse IgG (1:500; Chemicon) for OCT3/4. Nuclei were stained with 1 μg/mL Hoechst 33342 (Invitrogen).

**Flow Cytometric Analysis.** To analyze the populations for albumin-positive cells, hepatic differentiated hiPS/ESCs were dissociated in 0.25% (wt/vol) Trypsin-EDTA (Invitrogen) and then resuspended in 2% FBS/PBS (vol/vol). The collected cell suspensions were fixed with PBS containing 4% PFA (wt/vol), permeabilized with 0.1% (vol/vol) Triton X-100, and stained with an antibody against albumin and an Alexa488-conjugated secondary antibody described above. To analyze the CXCR4-positive cells, endodermally differentiated hiPS/ESCs were dissociated in Accutase and stained with a PE-conjugated CXCR4 antibody (R&D Systems FAB170P). The analyses were performed using a FACS Aria II flow cytometer (BD Biosciences).

**Functional Analysis of Hepatic Differentiated hiPS/ESCs in Vitro.** To evaluate the glycogen production and storage of the hepatic differentiated hiPS/ESCs, Periodic acid-Schiff (PAS) staining was performed. The cultured cells were fixed in 3.3% (vol/vol) formalin for 10 min, and intracellular glycogen was stained using a PAS staining solution (Muto Pure Chemicals), according to the manufacturer's instructions. For the albumin secretion assay, the culture media of differentiated cells after a 24-h incubation were collected and evaluated using the Human Albumin ELISA Quantitation kit (Bethyl Laboratories) according to the manufacturer's protocol. To examine their ability to metabolize ammonia, the cells were cultured for 24 h in phenol red-free DMEM (Nacalai Tesque) supplemented with 1.5 mM ammonium chloride (Nacalai Tesque). The ammonia concentrations in the culture media were measured using an Ammonia-Test kit (Wako), according to the manufacturer's protocol. To evaluate the cytochrome P450 3A4 activity, a P450-Glo CYP3A4 Assay kit (Luciferin-IPA; Promega) was used according to the manufacturer's protocol. Readout was performed with the Centro LB 960 detection system (Berthold). The CYP450 activity was expressed as the relative light units per 50 μL of medium.

**DNA Microarray Analysis.** Total RNA was purified with a miRNeasy mini kit (QIAGEN) according to the manufacturer's protocol. DNA microarray analysis was performed as described previously (2), using a SurePrint G3 Human Gene Expression 8 × 60K kit (G4851A; Agilent) and a G2565CA Microarray Scanner System (Agilent). The data were analyzed using the GeneSpring GX 11 software package (Agilent). Reported microarray data have been deposited in the public database Gene Expression Omnibus (<http://www.ncbi.nlm.nih.gov/geo/>) under accession no. GSE38155.

**Statistical Analysis.** All statistical analyses were performed with a one-way repeated-measures ANOVA and the Bonferroni post hoc test.

1. Hay DC, et al. (2008) Efficient differentiation of hepatocytes from human embryonic stem cells exhibiting markers recapitulating liver development in vivo. *Stem Cells* 26: 894–902.

2. Takahashi K, et al. (2007) Induction of pluripotent stem cells from adult human fibroblasts by defined factors. *Cell* 131:861–872.





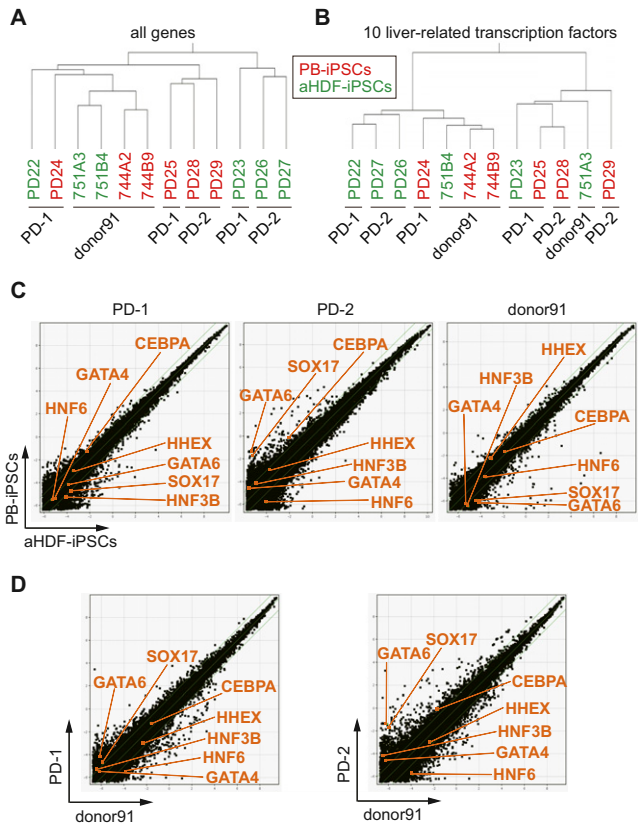

**Fig. 54.** Microarray analysis of hiPSC lines generated from the same individuals. (A and B) Hierarchical clustering analysis of undifferentiated peripheral blood (PB)-iPSCs and adult human dermal fibroblasts (aHDF)-iPSCs derived from the same individuals [Parkinson disease (PD) 1, PD-2, and donor91] was performed using all gene sets (A) and 10 liver-related transcription factors (B). (C and D) Scatter-plot analyses of undifferentiated PB-iPSCs and aHDF-iPSCs derived from the same individuals (PD-1, PD-2, and donor91) are shown. (C) Intra-individual comparisons between PB-iPSCs and aHDF-iPSCs. (D) Inter-individual comparisons of PB-iPSCs. Ten liver-related transcription factors are indicated by orange dots and letters. Only the detectable probes are shown. The green lines indicate the diagonal and twofold changes between the two samples.

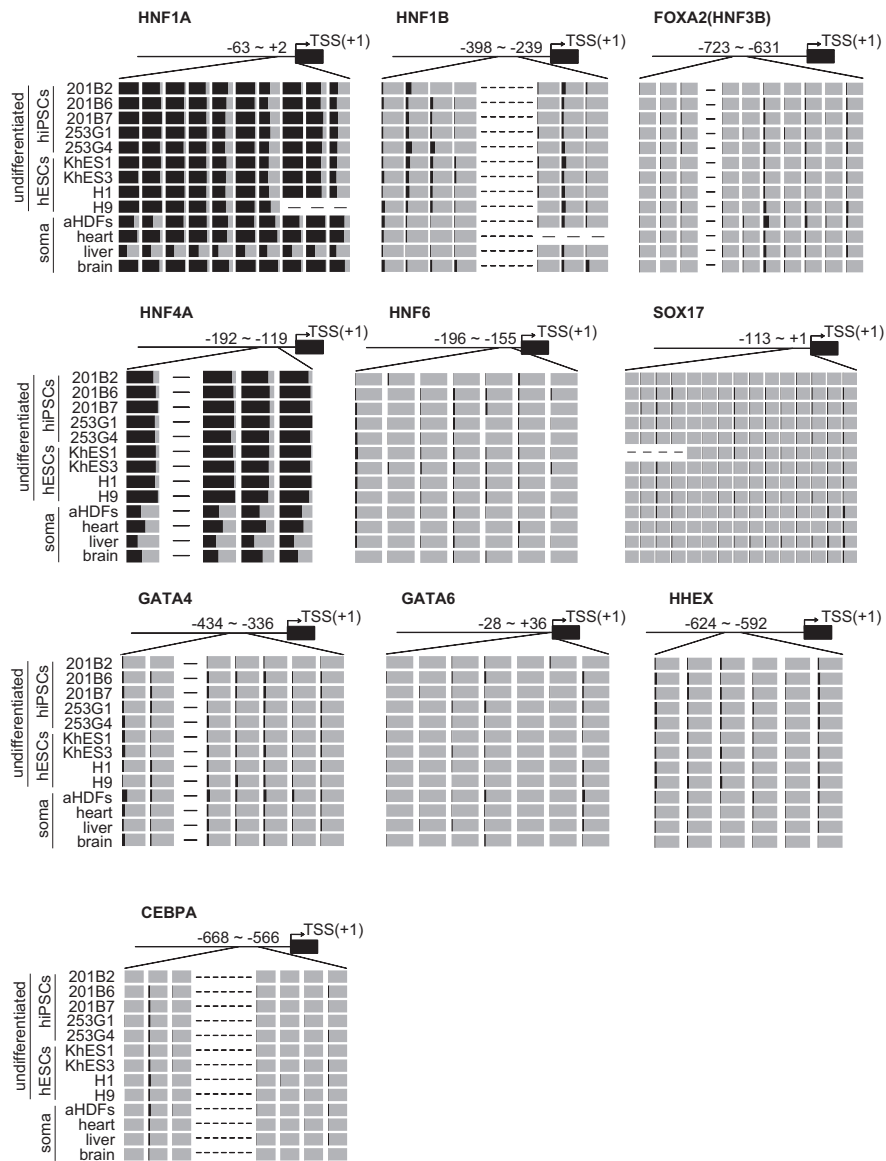

**Fig. S5.** Pyrosequencing analysis of the promoter of liver-related transcription factors in undifferentiated hiP/ESC lines and somatic tissues. Genomic DNA was obtained from undifferentiated hiPSCs (201B2, 201B6, 201B7, 253G1, and 253G4) and hESCs (KhES1, KhES3, H1, and H9). Genomic DNAs of adult human dermal fibroblasts (aHDFs), heart, liver, and brain were used as controls. A single column represents one CpG site. Solid bars indicate the percentage of methylated CpG sites and shaded bars indicate the percentage of unmethylated CpG sites. A hyphen represents one CpG site that was not analyzed. TSS: transcription start site.

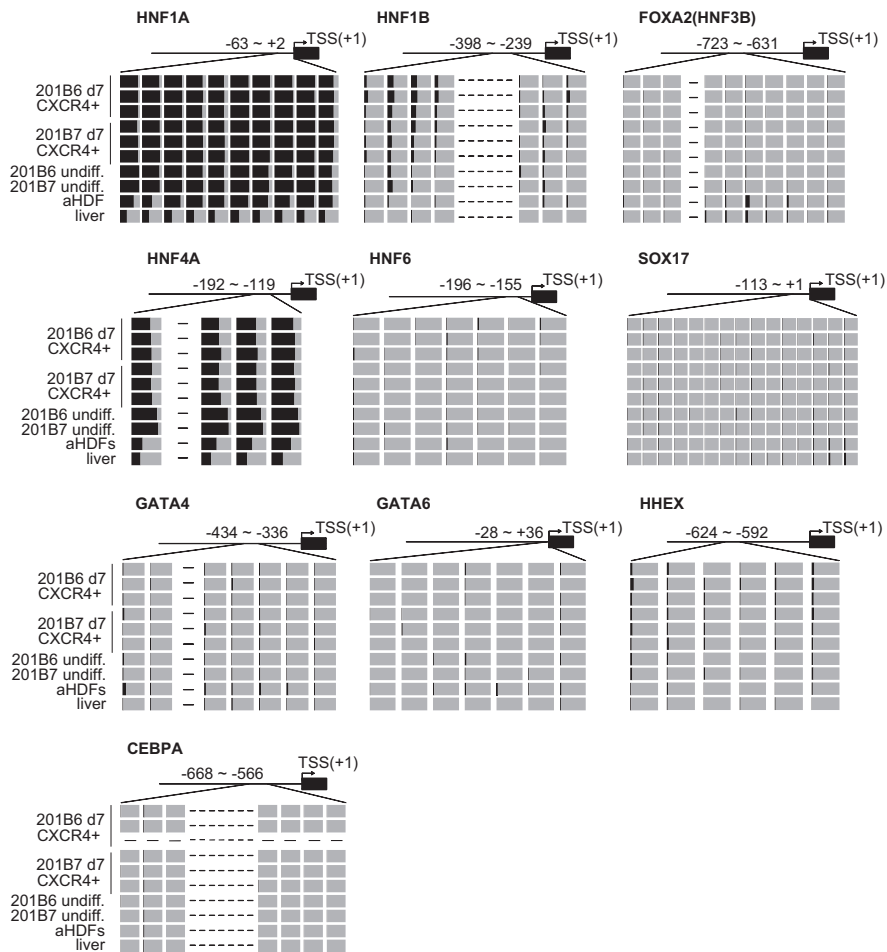

**Fig. S6.** Pyrosequencing analysis of the promoter of liver-related transcription factors in CXCR4-positive cells on day 7 of 201B6 and 201B7 hiPSC lines. Genomic DNA was obtained from CXCR4-positive cells on day 7 of 201B6 and 201B7 hiPSC lines, which were sorted by flow cytometry. Genomic DNAs of undifferentiated hiPSCs (201B6 and 201B7), adult human dermal fibroblasts (aHDFs), and adult liver were used as controls. A single column represents one CpG site. Solid bars indicate the percentage of methylated CpG sites and shaded bars indicate the percentage of unmethylated CpG sites. A hyphen represents one CpG site that was not analyzed. TSS: transcription start site.

**Table S1. Cell information for the experiment**

|                             | Name                                         | Vector       | Factors                              | Origin                           | Passage no. in<br>Figs. 4 and 5 |                |                                      |                                      |
|-----------------------------|----------------------------------------------|--------------|--------------------------------------|----------------------------------|---------------------------------|----------------|--------------------------------------|--------------------------------------|
| aHDF-iPSCs                  | 201B2                                        | Retrovirus   | O, S, K, c-MYC                       | aHDFs (Lot 1388)                 | 21, 22, 23                      |                |                                      |                                      |
|                             | 201B6                                        |              |                                      |                                  | 23, 24, 25                      |                |                                      |                                      |
|                             | 201B7                                        |              |                                      |                                  | 23, 24, 25                      |                |                                      |                                      |
|                             | 253G1                                        | Episomal     | O, S, K                              |                                  | 21, 22, 23                      |                |                                      |                                      |
|                             | 253G4                                        |              | 23, 24, 25                           |                                  |                                 |                |                                      |                                      |
|                             | 409B2                                        |              | O, S, K, L-MYC, LIN28, sh-p53        |                                  | 29, 30, 31                      |                |                                      |                                      |
|                             | 414C2                                        |              | 28, 30, 31                           |                                  |                                 |                |                                      |                                      |
| Dental pulp (DP)-iPSCs      | 451F3                                        | Episomal     | O, S, K, L-MYC, LIN28, sh-p53        | DP74 (HLA homozygous)            | 24, 25, 26                      |                |                                      |                                      |
|                             | 454E2                                        |              |                                      |                                  | 23, 24, 25                      |                |                                      |                                      |
|                             | 457C1                                        |              |                                      |                                  | 26, 27, 28                      |                |                                      |                                      |
| Peripheral blood (PB)-iPSCs | 585A1                                        | Episomal     | O, S, K, L-MYC, LIN28, sh-p53        | T lymphocytes (donor x)          | 23, 24, 25                      |                |                                      |                                      |
|                             | 585B1                                        |              |                                      |                                  | 23, 24, 25                      |                |                                      |                                      |
|                             | 604A1                                        |              |                                      |                                  | T lymphocytes (donor y)         | 29, 30, 31     |                                      |                                      |
|                             | 604A3                                        | Sendai virus | O, S, K, c-MYC                       |                                  | 29, 30, 31                      |                |                                      |                                      |
|                             | 604B1                                        |              |                                      |                                  | 27, 28, 29                      |                |                                      |                                      |
|                             | 622E1                                        |              |                                      |                                  | 22, 23, 24                      |                |                                      |                                      |
|                             | 622G1                                        |              |                                      |                                  | 22, 23, 24                      |                |                                      |                                      |
|                             | 703A1                                        |              |                                      |                                  | T lymphocytes (donor x)         | 21, 22, 23     |                                      |                                      |
|                             | 703B1                                        |              |                                      |                                  | 21, 22, 23                      |                |                                      |                                      |
| Cord blood (CB)-iPSCs       | 606A1                                        | Episomal     | O, S, K, L-MYC, LIN28, sh-p53        | CD34 <sup>+</sup> (donor a)      | 29, 30, 31                      |                |                                      |                                      |
|                             | 606B1                                        |              |                                      |                                  | 27, 28, 29                      |                |                                      |                                      |
|                             | 610A2                                        | Sendai virus | O, S, K, c-MYC                       |                                  | CD34 <sup>+</sup> (donor b)     | 25, 26, 27     |                                      |                                      |
|                             | 610B1                                        |              |                                      |                                  | 24, 25, 26                      |                |                                      |                                      |
|                             | 665A1                                        |              |                                      |                                  | 23, 24, 25                      |                |                                      |                                      |
|                             | 665A7                                        |              |                                      |                                  | 23, 24, 25                      |                |                                      |                                      |
|                             | TkCBV4-2                                     |              |                                      |                                  | Retrovirus                      | O, S, K, c-MYC | CD34 <sup>+</sup> /CD45 <sup>+</sup> | 60, 61, 62                           |
|                             | TkCBV5-6                                     |              |                                      |                                  |                                 |                |                                      | CD34 <sup>-</sup> /CD45 <sup>+</sup> |
| TkCB7-2                     |                                              |              | CD34 <sup>+</sup> /CD45 <sup>+</sup> | 22, 23, 24                       |                                 |                |                                      |                                      |
| hESCs                       | KhES1                                        | —            | —                                    | —                                | 25, 26, 27                      |                |                                      |                                      |
|                             | KhES3                                        |              |                                      |                                  | 29, 30, 31                      |                |                                      |                                      |
|                             | H1                                           |              |                                      |                                  | 51, 52, 53                      |                |                                      |                                      |
|                             | H9                                           |              |                                      |                                  | 42, 43, 44                      |                |                                      |                                      |
|                             | ES03                                         |              |                                      |                                  | 72, 73, 74                      |                |                                      |                                      |
|                             | ES04                                         |              |                                      |                                  | 81, 82, 83                      |                |                                      |                                      |
|                             | ES06                                         |              |                                      |                                  | 50, 51, 52                      |                |                                      |                                      |
|                             | aHDF- and PB-iPSCs from the same individuals |              |                                      |                                  |                                 |                |                                      |                                      |
| aHDF-iPSCs                  | CiRA-PD22                                    | Episomal     | O, S, K, L-MYC, LIN28, sh-p53        | Parkinson disease patient (PD-1) | 15, 16, 17                      |                |                                      |                                      |
|                             | CiRA-PD23                                    |              |                                      |                                  | 15, 16, 17                      |                |                                      |                                      |
| PB-iPSCs                    | CiRA-PD24                                    |              |                                      |                                  | 21, 22, 23                      |                |                                      |                                      |
|                             | CiRA-PD25                                    |              |                                      |                                  | 27, 28, 29                      |                |                                      |                                      |
| aHDF-iPSCs                  | CiRA-PD26                                    |              |                                      | Parkinson disease patient (PD-2) | 21, 22, 23                      |                |                                      |                                      |
|                             | CiRA-PD27                                    |              |                                      |                                  | 23, 24, 25                      |                |                                      |                                      |
| PB-iPSCs                    | CiRA-PD28                                    |              |                                      |                                  | 17, 18, 19                      |                |                                      |                                      |
|                             | CiRA-PD29                                    |              |                                      |                                  | 27, 28, 29                      |                |                                      |                                      |
| aHDF-iPSCs                  | 751A3                                        |              |                                      | Adult healthy donor (donor91)    | 19, 20, 21                      |                |                                      |                                      |
|                             | 751B4                                        |              |                                      |                                  | 19, 20, 21                      |                |                                      |                                      |
| PB-iPSCs                    | 744A2                                        |              |                                      |                                  | 19, 20, 21                      |                |                                      |                                      |
|                             | 744B9                                        |              |                                      |                                  | 19, 20, 21                      |                |                                      |                                      |

K, KLF4; O, OCT3/4; S, SOX2; sh-p53, p53-shRNA.

**Table S2. Primer information for RT-PCR**

| Target gene             | RT-PCR primers                | Sequence (5'–3')                                                     |
|-------------------------|-------------------------------|----------------------------------------------------------------------|
| <i>CYP1A1</i>           | hCYP1A1_F<br>hCYP1A1_R        | ACC TGA ATG AGA AGT TCT ACA GC<br>CTG GGG TTC ATC ACC AAA TAC A      |
| <i>CYP2C9</i>           | hCYP2C9_F<br>hCYP2C9_R        | CCC TGG ATC CAG ATC TGC AA<br>TGC TTG TCG TCT CTG TCC CA             |
| <i>CYP2C19</i>          | hCYP2C19_F<br>hCYP2C19_R      | GGT GCT GCA TGG ATA TGA AGT G<br>TGG ATC CAG GGG GTG CTT AC          |
| <i>CYP2D6</i>           | hCYP2D6_F<br>hCYP2D6_R        | CCT GCT CAT GAT CCT ACA TCC<br>ACC AGG AAA GCA AAG ACA CCA T         |
| <i>CYP3A4</i>           | hCYP3A4_F<br>hCYP3A4_R        | CCA AGC TAT GCT CTT CAC CG<br>TCA GGC TCC ACT TAC GGT GC             |
| <i>CYP7A1</i>           | hCYP7A1-RT-S<br>hCYP7A1-RT-AS | GTG CCA ATC CTC TTG AGT TCC<br>ACT CGG TAG CAG AAA GAA TAC ATC       |
| <i>MRP2(ABCC2)</i>      | hMRP2_F<br>hMRP2_R            | ACC TCC AAC AGG TGG CTT GCA<br>ACA CCA ATC TTC TCC ATG CTA CC        |
| <i>MDR1/TAP(ABCB11)</i> | hMDRTAP_F<br>hMDRTAP_R        | GTG CTG AGT AAG ATT CAG CAT GGG<br>AGC ATG TCA TCT TCA GTT GCA TCC T |
| <i>UGT1A1</i>           | hUGT1A1_F<br>hUGT1A1_R        | GTG CCT TTA TCA CCC ATG CT<br>TCT TGG ATT TGT GGG CTT TC             |
| <i>GAPDH</i>            | GAPDH-F<br>GAPDH-R            | ACC ACA GTC CAT GCC ATC AC<br>TCC ACC ACC CTG TTG CTG TA             |

**Table S3. Primer information for real-time PCR**

| Target gene                | Real-time PCR primers                         | Sequence (5'–3')                                                      |
|----------------------------|-----------------------------------------------|-----------------------------------------------------------------------|
| <i>OCT3/4(endo_3'-UTR)</i> | hOct4-S1165<br>hOct4-AS1283                   | GAC AGG GGG AGG GGA GGA GCT AGG<br>CTT CCC TCC AAC CAG TTG CCC CAA AC |
| <i>A1AT</i>                | hAAT-RT-S<br>hAAT-RT-AS                       | ACA TTT ACC CAA ACT GTC CAT T<br>GCT TCA GTC CCT TTC TCG TC           |
| <i>AFP</i>                 | hAFP-qS<br>hAFP-qAS                           | AAA TGC GTT TCT CGT TGC TT<br>GCC ACA GGC CAA TAG TTT GT              |
| <i>ALBUMIN</i>             | hALBUMIN-qS<br>hALBUMIN-qAS                   | CTT CCT GGG CAT GTT TTT GT<br>TGG CAT AGC ATT CAT GAG GA              |
| <i>TDO2</i>                | h_TDO2_RT-s<br>h_TDO2_RT-as                   | GAC GGC TGT CAT ACA GAG CA<br>CGC AGG TAG TGA TAG CCT GA              |
| <i>ASGR1</i>               | hASGR1-qS<br>hASGR1-qAS                       | CAC GTG AAG CAG TTC GTG TC<br>CGG AGC GAG AGA ACC AGT AG              |
| <i>HNF4A</i>               | hHNF4 $\alpha$ -RT-S<br>hHNF4 $\alpha$ -RT-AS | CCA CGG GCA AAC ACT ACG G<br>GGC AGG CTG CTG TCC TCA T                |
| <i>GAPDH</i>               | GAPDH-F<br>GAPDH-R                            | ACC ACA GTC CAT GCC ATC AC<br>TCC ACC ACC CTG TTG CTG TA              |



**Table S4. Primer information for pyrosequencing**

| Target gene  | Primer type          | Primers       | Sequence (5'-3')                        |
|--------------|----------------------|---------------|-----------------------------------------|
| <i>HNF4A</i> | F                    | hHNF4-PCR-F1  | GTG AGT TAG GGT TTT AGT AGT TGT A       |
|              | R                    | hHNF4-PCR-R1  | CCC AAT ACC CTC TCT ACC TT              |
|              | S                    | hHNF4-Seq-S1  | AGG GTT TTA GTA GTT GTA AT              |
| <i>SOX17</i> | S                    | hHNF4-Seq-S2  | TTT GTA GTT TAG TTT AGT TTA TTT A       |
|              | F                    | hSOX17-PCR-F1 | GGG GTA GGG GGA GGG GTA A               |
|              | R                    | hSOX17-PCR-R1 | ACC CCC AAC CCA CCT AAT AAC ACT         |
|              | S                    | hSOX17-Seq-S1 | GTG GGG TTG GAT TGG GA                  |
|              | S                    | hSOX17-Seq-S2 | GGT TTG GGA GTG GGT TTA A               |
| <i>HNF1A</i> | S                    | hSOX17-Seq-S3 | GTT ATA TTT GTG TAG AAA AGG T           |
|              | F                    | mehHNF1A-F1   | GGG TTT TGG GGG GGT AGT                 |
|              | R                    | mehHNF1A-R1-B | ACC CAA TAC CTA AAT CAA TAC CTC TTT ACT |
|              | S                    | mehHNF1A-S1   | GAG TTT GGT TTG TGT TT                  |
|              | S                    | mehHNF1A-S2   | ATT TAA GAG GTG GGG GAG G               |
| <i>HNF1B</i> | F                    | mehHNF1B-F1   | AAT GGA GTT TTT TTA GGG TAT GT          |
|              | R                    | mehHNF1B-R1-B | CAA ACT TCA CCT AAC CTT TAA ACT TAT T   |
|              | S                    | mehHNF1B-S1   | TTT GAG GGT TTT TTT GGT TTA TT          |
|              | S                    | mehHNF1B-S2   | GGA TTA AAG AGG AAT TGA GAA T           |
|              | <i>HNF6</i>          | F             | mehHNF6-F1                              |
| R            |                      | mehHNF6-R1-B  | ACC TTC CTT CCT CTC ACT AT              |
| S            |                      | mehHNF6-S1    | GGG GAG AGA GGT GGT                     |
| S            |                      | mehHNF6-S2    | GGG GTA TTG AGT TTT TTT AA              |
| <i>CEBPA</i> |                      | F             | mehCEBPA-F1                             |
|              | R                    | mehCEBPA-R1-B | TTT CAA AAC CAA AAC CAA ACC TAT C       |
|              | S                    | mehCEBPA-S1   | GGT AGT TTG GAG ATT AGA G               |
|              | S                    | mehCEBPA-S2   | GTT GTT TTG AGT TGT AGT TTT T           |
|              | <i>HHEX</i>          | F             | mehHHEX-F1                              |
| R            |                      | mehHHEX-R1-B  | ACT CAA AAC CAA ACA ATA CCC TAA ATT CC  |
| S            |                      | mehHHEX-S1    | GAG TTA GTA GTA TTT GAA TTT TAG T       |
| S            |                      | mehHHEX-S2    | GGG TAG TAG TTA AGG G                   |
| <i>GATA4</i> |                      | F             | mehGATA4-F1                             |
|              | R                    | mehGATA4-R1-B | CCC CCT TCC TAT AAT CCT CAT             |
|              | S                    | mehGATA4-S1   | ATT ATT TTT GTT TAG GAA TTA GTA         |
|              | S                    | mehGATA4-S2   | AGA GGT TAT TTT TTT TTT TAT TGG         |
|              | <i>FOXA2 (HNF3B)</i> | F             | mehFOXA2-F1                             |
| R            |                      | mehFOXA2-R1-B | AAT CCC TAA TCC AAC CCC CTT TCC TC      |
| S            |                      | mehFOXA2-S1   | AGA GAA TGA GTA TTG AGA G               |
| S            |                      | mehFOXA2-S2   | ATT TGT AGG GTA TTG AGG T               |
| <i>GATA6</i> |                      | F             | mehGATA6-F1                             |
|              | R                    | mehGATA6-R1-B | AAA ACT ACA ACC TAA ACT CCT AAT T       |
|              | S                    | mehGATA6-S1   | ATT TTT AGA GTT TAG TTG T               |
|              | S                    | mehGATA6-S2   | AGT TTA GAT TTA TAG TTT GGT ATT         |

F, forward primer; R, biotinized reverse primer; S, sequence primer.
